# Supplementary material
Source: Springer Nature journal article supplement (https://www.springermedizin.de/resource/supplementary/12916_2012_830_MOESM2_ESM.pdf/9598668)
Supplement: MOESM2 [file 9598668]

## Enrollment

Assessed for eligibility (n=385)

Excluded (n=144)  
◆ Not meeting inclusion criteria (n=63)  
◆ Declined to participate (n=81)

Randomised (n=241)

## Allocation

Allocated to intervention (n=120)  
◆ Received allocated intervention (n=116)  
◆ Did not receive allocated intervention (n=4;  
3 died before any contact, 1 withdrew)

Allocated to control group (n=121)  
◆ Received allocated control intervention (n=121)  
◆ Did not receive allocated control intervention  
(n=0, not applicable)

## Follow-Up

**At 3 months**  
Lost to follow-up (n=11; 6 died, 1 withdrew, 3 declined interview, 1 not interviewed).  
**At 12 months**  
Lost to follow-up (n=13; 12 died, 1 withdrew).

**At 3 months**  
Lost to follow-up (n=4; 1 died, 2 withdrew, 1 not interviewed)  
**At 12 months**  
Lost to follow-up (n=12; 10 died, 2 withdrew)

## Analysis

Analysed at 3 months (n=109)  
Analysed at 12 months (n=107)

Analysed at 3 months (n=117)  
Analysed at 12 months (n=109)
